# Supplementary material for: Cross-polarized and stable second harmonic generation from monocrystalline copper
Source: publisher site journal article supplement (doi:10.1515/nanoph-2025-0388), 2025-11-18
Supplement: Supplementary file [file j_nanoph-2025-0388_suppl_001.pdf]

# Supporting Information

## Cross-polarized and Stable Second Harmonic Generation from Monocrystalline Copper

Elif Nur Dayi<sup>1</sup>, Omer Can Karaman<sup>1</sup>, Diotime Pellet<sup>1</sup>, Alan R. Bowman<sup>\*2</sup>, and Giulia Tagliabue<sup>†1</sup>

<sup>1</sup>Laboratory of Nanoscience for Energy Technologies (LNET), STI, École Polytechnique  
Fédérale de Lausanne, 1015 Lausanne, Switzerland

<sup>2</sup>Department of Physics, University of Oxford, Oxford OX1 3PU, United Kingdom

November 6, 2025

---

<sup>\*</sup>Correspondence email: [alan.bowman@physics.ox.ac.uk](mailto:alan.bowman@physics.ox.ac.uk)

<sup>†</sup>Correspondence email: [giulia.tagliabue@epfl.ch](mailto:giulia.tagliabue@epfl.ch)

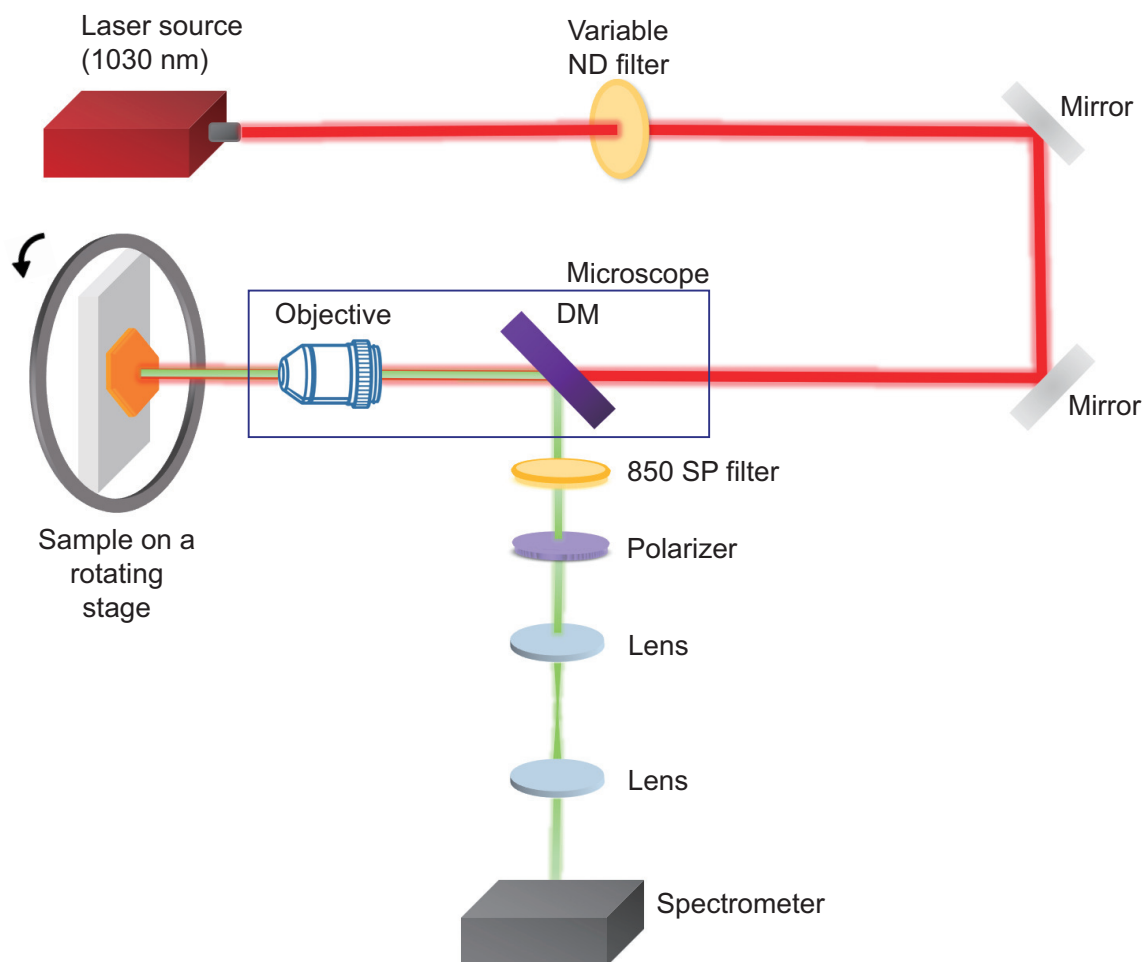

**Figure S1:** Schematic of the setup used for SHG measurements. The measurements were recorded using a microscope (Nikon Eclipse T2) coupled to a spectrometer (Princeton Instruments Spectra Pro HRS-500). A 1030nm femtosecond laser (NKT Origami) was used as excitation source and focused onto the sample by a 60x objective (Nikon S Plan Fluor ELWD, NA=0.7). An 750nm dichroic mirror (DM) was used to separate the fundamental and emitted signals. SP: Shortpass, ND: Neutral density. For the polarization-resolved measurements, a polarizer was inserted to the collection path.

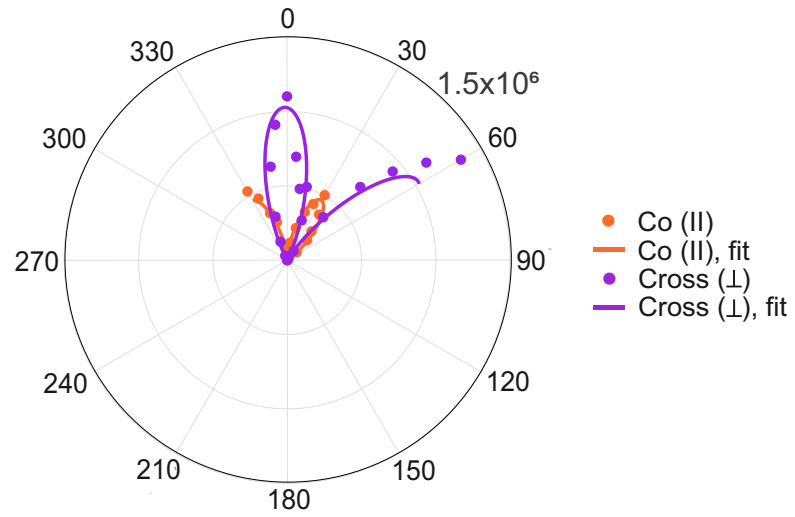

**Figure S2:** Polarization-resolved SHG measurements from a monocrystalline copper microflake in 0-90° range used for Fourier imaging measurements. Polar plot of SHG intensity as a function of detection polarization angle for co-polarized (orange) and cross-polarized (purple) emission, acquired at fixed incident polarization under  $2 \text{ mW}/\mu\text{m}^2$  beam intensity.

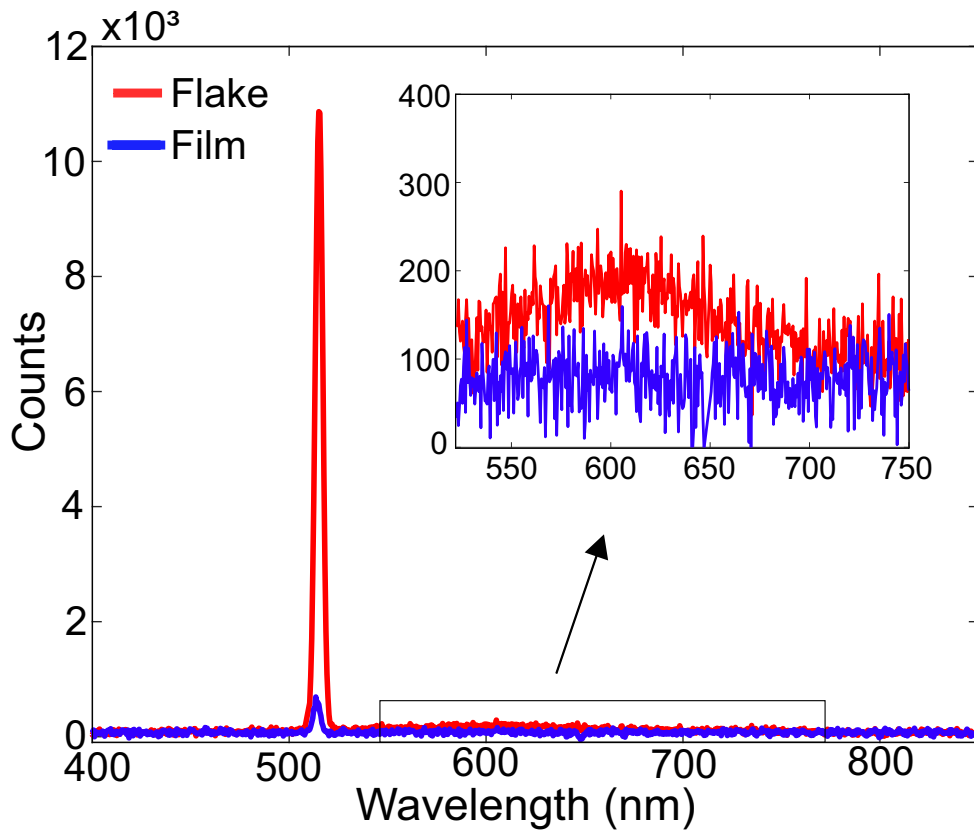

**Figure S3:** Relative SHG intensities for monocrystalline microflakes (red) and polycrystalline films (blue) when exciting at 1030 nm with  $2.15 \text{ mW}/\mu\text{m}^2$  beam intensity. Inset shows expanded view of the two-photon photoluminescence response of the microflake in the 550-750 nm range. Small spot-to-spot and thickness dependent variation observed in the TPL strength wasn't thoroughly explored as it's not the main focus of this study.

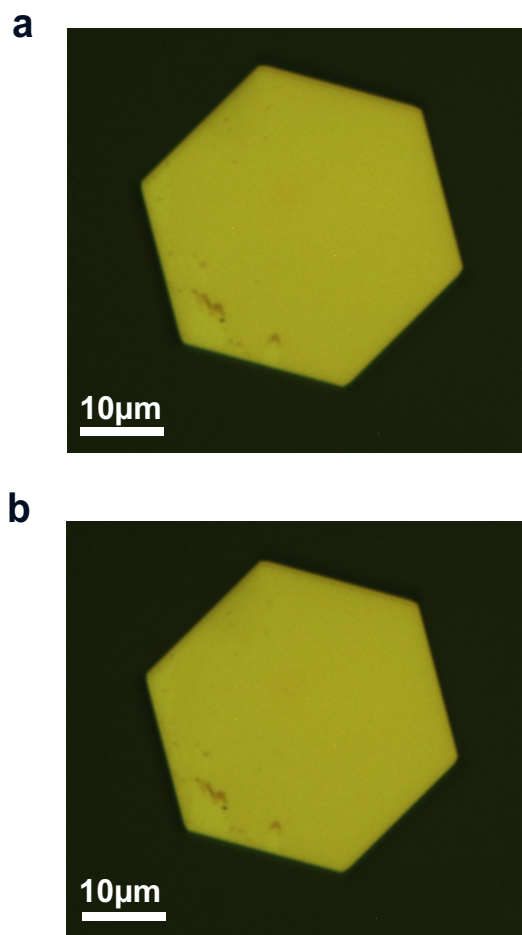

**Figure S4:** Bright-light images of the Cu microflake (a) before and (b) after 3 hours of continuous illumination under  $2 \text{ mW}/\mu\text{m}^2$ , showing no visible change to the flake surface under prolonged exposure.
